# Supplementary material
Source: Springer Nature journal article supplement (https://www.springermedizin.de/resource/supplementary/12889_2006_663_MOESM8_ESM.pdf/9502252)

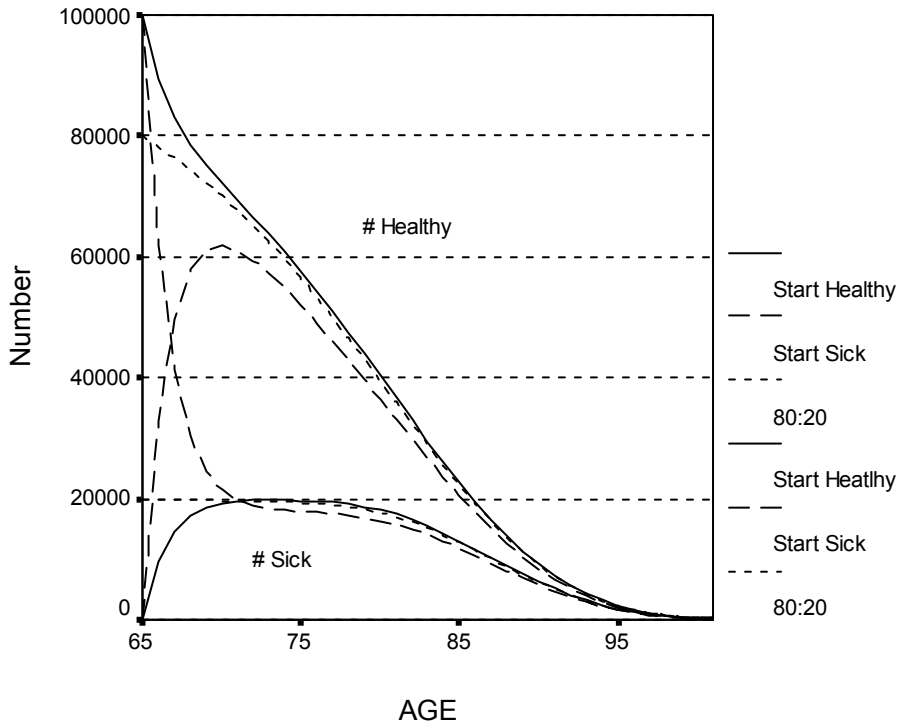

Supplement: MOESM8 [file 9502252]
